# Supplementary material
Source: PubMed Central journal article supplement (PMC5139602)
Supplement: CVI.00399-16_zcd999095418s1.pdf [file CVI.00399-16_zcd999095418s1.pdf]

**Supplementary Table 1: Population Demographics**

|                        | <b>Cohort 1</b><br><b>0.01 mcg</b><br>(n=4) | <b>Cohort 2</b><br><b>0.1 mcg</b><br>(n=4) | <b>Cohort 3</b><br><b>0.5 mcg</b><br>(n=4) | <b>Cohort 4</b><br><b>2.5 mcg</b><br>(n=4) | <b>Cohort 5</b><br><b>10 mcg</b><br>(n=4) | <b>Cohort 6</b><br><b>20 mcg</b><br>(n=4) | <b>Cohort 7</b><br><b>20 mcg x2</b><br>(n=4) | <b>All</b><br><b>Cohorts</b><br>N=28 |
|------------------------|---------------------------------------------|--------------------------------------------|--------------------------------------------|--------------------------------------------|-------------------------------------------|-------------------------------------------|----------------------------------------------|--------------------------------------|
| Age, Year              |                                             |                                            |                                            |                                            |                                           |                                           |                                              |                                      |
| Mean                   | 28.4                                        | 30.8                                       | 28.0                                       | 29.3                                       | 33.0                                      | 34.6                                      | 33.1                                         | 31.7                                 |
| (min, max)             | (23, 32)                                    | (28, 32)                                   | (23, 30)                                   | (24, 33)                                   | (25, 38)                                  | (33, 36)                                  | (25, 35)                                     | (23, 38)                             |
| Gender, n (%)          |                                             |                                            |                                            |                                            |                                           |                                           |                                              |                                      |
| Female                 | 3 (75.0)                                    | 2 (50.0)                                   | 3 (75.0)                                   | 2 (50.0)                                   | 1 (25.0)                                  | 3 (75.0)                                  | 3 (75.0)                                     | 17 (60.7)                            |
| Male                   | 1 (25.0)                                    | 2 (50.0)                                   | 1 (25.0)                                   | 2 (50.0)                                   | 3 (75.0)                                  | 1 (25.0)                                  | 1 (25.0)                                     | 11 (39.3)                            |
| Ethnicity, n (%)       |                                             |                                            |                                            |                                            |                                           |                                           |                                              |                                      |
| Hispanic or Latino     | 1 (25.0)                                    | 1 (25.0)                                   | 0 (0.0)                                    | 0 (0.0)                                    | 0 (0.0)                                   | 0 (0.0)                                   | 0 (0.0)                                      | 2 (7.1)                              |
| Non-Hispanic/Latino    | 3 (75.0)                                    | 3 (75.0)                                   | 4 (100.0)                                  | 4 (100.0)                                  | 4 (100.0)                                 | 4 (100.0)                                 | 4 (100.0)                                    | 26 (92.9)                            |
| Race, n (%)            |                                             |                                            |                                            |                                            |                                           |                                           |                                              |                                      |
| Black/African-American | 1 (25.0)                                    | 2 (50.0)                                   | 0 (0.0)                                    | 1 (25.0)                                   | 2 (50.0)                                  | 4 (100.0)                                 | 2 (50.0)                                     | 12 (42.9)                            |
| White                  | 3 (75.0)                                    | 2 (50.0)                                   | 3 (75.0)                                   | 2 (50.0)                                   | 1 (25.0)                                  | 0 (0.0)                                   | 1 (25.0)                                     | 12 (42.9)                            |
| Asian                  | 0 (0.0)                                     | 0 (0.0)                                    | 1 (25.0)                                   | 1 (25.0)                                   | 0 (0.0)                                   | 0 (0.0)                                   | 0 (0.0)                                      | 2 (7.1)                              |
| Multi-racial           | 0 (0.0)                                     | 0 (0.0)                                    | 0 (0.0)                                    | 0 (0.0)                                    | 1 (25.0)                                  | 0 (0.0)                                   | 1 (25.0)                                     | 2 (7.1)                              |

**Supplemental Table 2: Serum anti-SEB IgG ELISA antibody, Geometric Mean Titers (95% Confidence Intervals)**

|          | <b>Cohort 1</b><br><b>0.01 mcg</b><br>N=4               | <b>Cohort 2</b><br><b>0.1 mcg</b><br>N=4                | <b>Cohort 3</b><br><b>0.5 mcg</b><br>N=4                | <b>Cohort 4</b><br><b>2.5 mcg</b><br>N=4                                  | <b>Cohort 5</b><br><b>10 mcg</b><br>N=4                 | <b>Cohort 6</b><br><b>20 mcg</b><br>N=4                                   |
|----------|---------------------------------------------------------|---------------------------------------------------------|---------------------------------------------------------|---------------------------------------------------------------------------|---------------------------------------------------------|---------------------------------------------------------------------------|
| Baseline | 8.05 x10 <sup>3</sup><br>(99.0, 6.55 x10 <sup>5</sup> ) | 4.00 x10 <sup>3</sup><br>(441, 3.63 x10 <sup>4</sup> )  | 2.99 x10 <sup>3</sup><br>(69.6, 1.29 x10 <sup>5</sup> ) | 3.26 x10 <sup>4</sup><br>(1.72 x10 <sup>4</sup> , 6.19 x10 <sup>4</sup> ) | 9.88 x10 <sup>3</sup><br>(70.7, 1.38 x10 <sup>6</sup> ) | 1.33 x10 <sup>4</sup><br>(3.64 x10 <sup>3</sup> , 4.89 x10 <sup>4</sup> ) |
| Day 7    | 9.13 x10 <sup>3</sup><br>(98.3, 8.48 x10 <sup>5</sup> ) | 4.58 x10 <sup>3</sup><br>(551, 3.82 x10 <sup>4</sup> )  | 5.20 x10 <sup>3</sup><br>(114, 2.38 x10 <sup>5</sup> )  | 6.92 x10 <sup>4</sup><br>(1.51 x10 <sup>4</sup> , 3.18 x10 <sup>5</sup> ) | 2.87 x10 <sup>4</sup><br>(170, 4.87 x10 <sup>6</sup> )  | 6.18 x10 <sup>4</sup><br>(2.19 x10 <sup>4</sup> , 1.75 x10 <sup>5</sup> ) |
| Day 14   | 1.21 x10 <sup>4</sup><br>(102, 1.43 x10 <sup>6</sup> )  | 1.48 x10 <sup>4</sup><br>(2250, 9.74 x10 <sup>4</sup> ) | 3.71 x10 <sup>4</sup><br>(1730, 7.93 x10 <sup>5</sup> ) | 5.18 x10 <sup>5</sup><br>(1.05 x10 <sup>5</sup> , 2.56 x10 <sup>6</sup> ) | 1.31 x10 <sup>5</sup><br>(1040, 1.64 x10 <sup>7</sup> ) | 5.13 x10 <sup>5</sup><br>(1.05 x10 <sup>5</sup> , 2.51 x10 <sup>6</sup> ) |
| Day 21   | 1.32 x10 <sup>4</sup><br>(123, 1.42 x10 <sup>6</sup> )  | 1.99 x10 <sup>4</sup><br>(3030, 1.31 x10 <sup>5</sup> ) | 4.36 x10 <sup>4</sup><br>(3540, 5.37 x10 <sup>5</sup> ) | 6.65 x10 <sup>5</sup><br>(1.20 x10 <sup>5</sup> , 3.69 x10 <sup>6</sup> ) | 2.13 x10 <sup>5</sup><br>(3680, 1.23 x10 <sup>7</sup> ) | 6.82 x10 <sup>5</sup><br>(1.43 x10 <sup>5</sup> , 3.26 x10 <sup>6</sup> ) |
| Day 28   | 1.31 x10 <sup>4</sup><br>(104, 1.64 x10 <sup>6</sup> )  | 2.27 x10 <sup>4</sup><br>(3350, 1.54 x10 <sup>5</sup> ) | 3.98 x10 <sup>4</sup><br>(2840, 5.58 x10 <sup>5</sup> ) | 8.53 x10 <sup>5</sup><br>(2.01 x10 <sup>5</sup> , 3.61 x10 <sup>6</sup> ) | 2.55 x10 <sup>5</sup><br>(4390, 1.48 x10 <sup>7</sup> ) | 6.89 x10 <sup>5</sup><br>(1.25 x10 <sup>5</sup> , 3.80 x10 <sup>6</sup> ) |
| Day 56   | 1.18 x10 <sup>4</sup><br>(101, 1.36 x10 <sup>6</sup> )  | 2.42 x10 <sup>4</sup><br>(3600, 1.62 x10 <sup>5</sup> ) | 3.45 x10 <sup>4</sup><br>(2730, 4.36 x10 <sup>5</sup> ) | 9.53 x10 <sup>5</sup><br>(2.22 x10 <sup>5</sup> , 4.09 x10 <sup>6</sup> ) | 2.86 x10 <sup>5</sup><br>(4370, 1.87 x10 <sup>7</sup> ) | 7.69 x10 <sup>5</sup><br>(3.24 x10 <sup>5</sup> , 1.83 x10 <sup>6</sup> ) |

|                  | <b>Cohort 7</b><br><b>20 mcg x2</b><br>N=4              |
|------------------|---------------------------------------------------------|
| Baseline         | 3.29 x10 <sup>3</sup><br>(510, 2.12 x10 <sup>4</sup> )  |
| Day 7            | 1.18 x10 <sup>4</sup><br>(225, 6.13 x10 <sup>5</sup> )  |
| Day 14           | 1.61 x10 <sup>5</sup><br>(1880, 1.38 x10 <sup>7</sup> ) |
| Day 21 (dose #2) | 1.82 x10 <sup>5</sup><br>(2130, 1.55 x10 <sup>7</sup> ) |
| Day 28           | 1.99 x10 <sup>5</sup><br>(3560, 1.11 x10 <sup>7</sup> ) |
| Day 35           | 1.83 x10 <sup>5</sup><br>(4870, 6.84 x10 <sup>6</sup> ) |
| Day 42           | 1.98 x10 <sup>5</sup><br>(6290, 6.27 x10 <sup>6</sup> ) |
| Day 49           | 1.91 x10 <sup>5</sup><br>(6080, 5.99 x10 <sup>6</sup> ) |
| Day 77           | 1.57 x10 <sup>5</sup><br>(6940, 3.57 x10 <sup>6</sup> ) |

**Supplemental Table 3: Serum staphylococcal enterotoxin B toxin neutralizing antibody, GMT (95% CI)**

|          | <b>Cohort 1</b><br><b>0.01 mcg</b><br>N=4 | <b>Cohort 2</b><br><b>0.1 mcg</b><br>N=4 | <b>Cohort 3</b><br><b>0.5 mcg</b><br>N=4 | <b>Cohort 4</b><br><b>2.5 mcg</b><br>N=4                                  | <b>Cohort 5</b><br><b>10 mcg</b><br>N=3 | <b>Cohort 6</b><br><b>20 mcg</b><br>N=4                                   |
|----------|-------------------------------------------|------------------------------------------|------------------------------------------|---------------------------------------------------------------------------|-----------------------------------------|---------------------------------------------------------------------------|
| Baseline | 1500<br>(22.3, 1.01 x10 <sup>5</sup> )    | 1010<br>(133, 7620)                      | 1140<br>(18.7, 6.96 x10 <sup>4</sup> )   | 2660<br>(2040, 3470)                                                      | 2380<br>(0.21, 2.70 x10 <sup>7</sup> )  | 2540<br>(493, 1.31 x10 <sup>4</sup> )                                     |
| Day 7    | 1620<br>(18.9, 1.38 x10 <sup>5</sup> )    | 1150<br>(95.7, 1.38 x10 <sup>4</sup> )   | 1390<br>(20.7, 9.35 x10 <sup>4</sup> )   | 9410<br>(1120, 7.92 x10 <sup>4</sup> )                                    | 2600<br>(0.19, 3.66 x10 <sup>7</sup> )  | 1.25 x10 <sup>4</sup><br>(4910, 3.16 x10 <sup>4</sup> )                   |
| Day 14   | 2360<br>(21.8, 2.56 x10 <sup>5</sup> )    | 3340<br>(421, 2.65 x10 <sup>4</sup> )    | 5340<br>(422, 6.76 x10 <sup>4</sup> )    | 8.30 x10 <sup>4</sup><br>(2.16 x10 <sup>4</sup> , 3.19 x10 <sup>5</sup> ) | 8120<br>(0.05, 1.24 x10 <sup>9</sup> )  | 1.32 x10 <sup>5</sup><br>(1.94 x10 <sup>4</sup> , 8.93 x10 <sup>5</sup> ) |
| Day 21   | 2330<br>(22.8, 2.37 x10 <sup>5</sup> )    | 4170<br>(517, 3.37 x10 <sup>4</sup> )    | 5110<br>(363, 7.17 x10 <sup>4</sup> )    | 1.06 x10 <sup>5</sup><br>(1.15 x10 <sup>4</sup> , 9.77 x10 <sup>5</sup> ) | 8910<br>(0.05, 1.67 x10 <sup>9</sup> )  | 2.03 x10 <sup>5</sup><br>(3.35 x10 <sup>4</sup> , 1.23 x10 <sup>6</sup> ) |
| Day 28   | 2450<br>(22.2, 2.70 x10 <sup>5</sup> )    | 4400<br>(389, 4.98 x10 <sup>4</sup> )    | 4940<br>(540, 4.52 x10 <sup>4</sup> )    | 1.68 x10 <sup>5</sup><br>(3.20 x10 <sup>4</sup> , 8.85 x10 <sup>5</sup> ) | 7510<br>(0.06, 9.71 x10 <sup>8</sup> )  | 1.33 x10 <sup>5</sup><br>(4.36 x10 <sup>4</sup> , 4.07 x10 <sup>5</sup> ) |
| Day 56   | 2790<br>(22.7, 3.44 x10 <sup>5</sup> )    | 5220<br>(53.7, 5.07 x10 <sup>4</sup> )   | 4830<br>(512, 4.56 x10 <sup>4</sup> )    | 1.21 x10 <sup>5</sup><br>(2.11 x10 <sup>4</sup> , 6.96 x10 <sup>5</sup> ) | 6440<br>(0.07, 6.11 x10 <sup>8</sup> )  | 1.44 x10 <sup>5</sup><br>(3.76 x10 <sup>4</sup> , 5.52 x10 <sup>5</sup> ) |

|                  | <b>Cohort 7</b><br><b>20 mcg x 2</b><br>N=4                               |
|------------------|---------------------------------------------------------------------------|
| Baseline         | 768<br>(34.9, 1.69 x10 <sup>4</sup> )                                     |
| Day 7            | 3160<br>(9.74, 1.02 x10 <sup>6</sup> )                                    |
| Day 14           | 3.26 x10 <sup>4</sup><br>(166, 6.42 x10 <sup>6</sup> )                    |
| Day 21 (dose #2) | 5.47 x10 <sup>4</sup><br>(1030, 2.91 x10 <sup>6</sup> )                   |
| Day 28           | 1.08 x10 <sup>5</sup><br>(6310, 1.85 x10 <sup>6</sup> )                   |
| Day 35           | 1.30 x10 <sup>5</sup><br>(9650, 1.76 x10 <sup>6</sup> )                   |
| Day 42           | 1.17 x10 <sup>5</sup><br>(1.15 x10 <sup>4</sup> , 1.20 x10 <sup>6</sup> ) |
| Day 49           | 1.05 x10 <sup>5</sup><br>(7500, 1.47 x10 <sup>6</sup> )                   |
| Day 77           | 8.79 x10 <sup>4</sup><br>(5600, 1.38 x10 <sup>6</sup> )                   |
